# Supplementary material
Source: Research Square preprint supplement (doi:10.21203/rs.3.rs-9902023/v1)
Supplement: Supplementary file 1 [file 6c408384d7b1113a3aadac86.docx]

**Supplementary Information**

**Defect-induced electrostatic anchoring for extreme-temperature power device encapsulation**

*Qi Wang, Yongmei Gan, Yisen Lv, Tianshu Yuan, Dingkun Ma, Hongyan Xia*, and Laili Wang**

*Qi Wang, Yongmei Gan, Yisen Lv, Tianshu Yuan, Dingkun Ma, Laili Wang*

*State Key Laboratory of Electrical Insulation and Power Equipment,*

*School of Electrical Engineering*

*Xi’an Jiaotong University*

*Xi’an, Shaanxi, 710049, P. R. China*

*mail: [llwang@mail.xjtu.edu.cn](mailto:llwang@mail.xjtu.edu.cn)*

*Hongyan Xia*

*State Key Laboratory of Porous Metal Materials,*

*Xi’an Jiaotong University*

*Xi’an, Shaanxi, 710049, P. R. China*

**Composites Fabrication**

To investigate the respective effect of BN and CeO2 fillers on SG matrix, and to determine the optimal doping ratio, a series of doping groups were designed (Table 1-3).

**Table.1** BN doped SG group.

|  | SG / 2BN | SG / 4BN | SG / 6BN | SG / 8BN | SG / 10BN | SG / 12BN |
| --- | --- | --- | --- | --- | --- | --- |
| BN (%) | 2 | 4 | 6 | 8 | 10 | 12 |
| SG (%) | 98 | 96 | 94 | 92 | 90 | 88 |

**Table.2** CeO2 doped SG group.

|  | SG / 2CeO2 | SG / 4CeO2 | SG / 6CeO2 | SG / 8CeO2 | SG / 10CeO2 | SG / 12CeO2 |
| --- | --- | --- | --- | --- | --- | --- |
| CeO2 (%) | 2 | 4 | 6 | 8 | 10 | 12 |
| SG (%) | 98 | 96 | 94 | 92 | 90 | 88 |

**Table.3** BN/CeO₂ synergistically doped SG group.

|  | Pure SG | SG / 1BN / 1CeO2 | SG / 2BN / 2CeO2 | SG / 3BN / 3CeO2 | SG / 4BN/ 4CeO2 | SG / 5BN / 5CeO2 | SG / 6BN / 6CeO2 |
| --- | --- | --- | --- | --- | --- | --- | --- |
| CeO2(%) | 0 | 1 | 2 | 3 | 4 | 5 | 6 |
| BN (%) | 0 | 1 | 2 | 3 | 4 | 5 | 6 |
| SG (%) | 100 | 98 | 96 | 94 | 92 | 90 | 88 |

Hexagonal boron nitride (h-BN) powder, with particle size of about 100 nm and density of 0.79 g/cm³, was procured from Suzhou Yuante New Material Co., Ltd. Cerium (IV) oxide CeO2 nanopowder, with particle size of about 50 nm and density of 1.03 g/cm³, was purchased from Qinghe County Kego Metallurgical Materials Co., Ltd. The SG matrix was based on platinum-cure system, which included vinyl-terminated polydimethylsiloxane (PDMS) base polymer (viscosity: 1000 mm²/s, vinyl content: 0.32%, density: 0.95 g/cm³), hydrosiloxane cross-linker, and platinum catalyst. All of which were supplied by Silicone Home (Shenzhen) Chemical Products Co., Ltd. The inhibitor, 1-ethynyl-1-cyclohexanol, was obtained from Beijing Jianqiang Weiye Technology Co., Ltd. The dichloromethane standard solution was purchased from McLean Company.

BN and CeO2 nanopowders were calcined for 2 h in an argon atmosphere at 700 °C and then transferred to a magnetic stirring system. PDMS was added to the mixture, which was stirred at 60 °C for 24 h. The mixture was then transferred to a vacuum defoaming stirrer. Platinum catalyst and hydrogen-containing silicone oil were sequentially added, followed by vacuum stirring for 15 min to promote homogeneous mixing and bubble removal. The composite mixture was poured into pre-prepared molds and cured at 80 °C for 24 h.

Dielectric properties were characterized by a broadband dielectric spectrometer (Novocontrol Concept 80). The volume resistivity was measured using a three-electrode system and an insulation resistivity tester (Model 6517B), with the ambient temperature controlled by a temperature-controlled chamber and a DC voltage of 1000 V applied. The dispersion state and microstructure of the samples were observed using a field emission scanning electron microscope (ZEISS Sigma 300). Simultaneously, energy-dispersive X-ray spectroscopy (EDS) elemental mapping was performed to investigate the spatial distribution of BN and CeO2 fillers. Phase analysis of the raw filler powders and composite samples was carried out using an X-ray diffractometer (XRD, Rigaku SmartLab SE). The surface chemical composition and elemental valence states of the samples were analyzed by X-ray photoelectron spectroscopy (XPS, Thermo Fisher ESCALAB Xi+). Dynamic mechanical analysis (DMA, TA Q800, shear mode) was employed to evaluate the interfacial compatibility within the system.The coefficient of thermal expansion (CTE) was measured using a TA Instruments TMA Q400.

First-principles calculations based on Density Functional Theory (DFT) were employed to reveal the microscopic binding mechanism and electronic properties of the h-BN/CeO2 interface. A CeO2 (111) surface model was constructed as the substrate due to its lowest surface energy, upon which an h-BN monolayer was placed. To simulate the impact of oxygen vacancy defects on interfacial properties, a defective interface model was established by removing an oxygen atom from the CeO₂ surface layer.

The Work of Adhesion (Wad) was employed to quantitatively evaluate the interfacial binding strength. It is defined as the energy required per unit area to separate the interface into two free surfaces, calculated as:

where Etotal, EBN, and ECeO₂ represent the energies of the optimized overall system, the isolated h-BN layer, and the isolated CeO2 layer, respectively, and A denotes the interfacial contact area.

The Charge Density Difference (CDD) was computed to visualize the charge transfer and redistribution at the interface, defined as:

where *ρtotal*, *ρBN*, and *ρCeO₂* correspond to the charge densities of the overall system and the respective isolated components.

**Note S1. Theoretical calculation methods**

All density functional theory (DFT) calculations were performed using the Vienna Ab initio Simulation Package (VASP)1. The Perdew-Burke-Ernzerhof (PBE) functional within the generalized gradient approximation (GGA) was employed to describe electron exchange-correlation interactions2. The plane-wave cutoff energy was set to 450 eV, and a 5×5×5 k-point mesh (Monkhorst-Pack scheme) was adopted for Brillouin zone integration. Structural relaxations were conducted until the forces on all atoms were below 0.01 eV/Å, with an energy convergence criterion of 5×10−5 eV between electronic steps..

**Note S2. Calculation Methods for TSDC Parameters (Trapped Charge Capacity *Q* and Trap Depth *Ea*)**

Initially, the sample was heated to 150 °C, and a DC electric field of 1 kV/mm was applied to inject charge carriers. The sample was then rapidly cooled to −50 °C under the applied field to suppress carrier detrapping from localized traps. After the voltage was removed, the sample was short-circuited to remove residual surface charges. Finally, the sample was heated to 250 °C at a constant rate of 2 °C/min, and the depolarization current was recorded using a Keithley 6487 electrometer. The trap activation energy and trapped charge capacity were calculated from the TSDC spectra.

To evaluate the space-charge trapping characteristics at 250 °C, the TSDC spectra were analyzed to extract the trapped charge capacity Q and trap depth Ea. (Because the shallow relaxation peaks in pure SG and SG/8BN are broad and poorly resolved, their trap depths were estimated using an Arrhenius-type approximation, whereas the distinct high-temperature peaks in CeO2-containing samples were analysed using Chen’s peak-shape method.)
**1. Calculation of Trapped Charge Capacity (*Q*)**

The trapped charge capacity Q was obtained by integrating the baseline-corrected depolarization current peak. The TSDC measurement was started from a sub-ambient temperature to improve baseline stability and reduce the loss of shallow-trap signals before heating. After linear baseline subtraction to reduce background conduction contributions, Q was calculated by numerical integration of the current over time or temperature.

where *I(T)* is the baseline-corrected depolarization current (in Amperes), *T1* and *T2* are the onset and end temperatures of the depolarization peak (in Kelvin), and *β* is the constant heating rate (*β* = 2℃/min≈ 0.0333 K/s).

1. **Evaluation of Trap Depth (*Ea*)**

The trap depth Ea was extracted using different approaches according to the characteristics of the TSDC peaks and the dominant trap types.

(i) For discrete deep-level traps (SG/4BN/4CeO2 composite and SG/8CeO2 composite):

For CeO2-containing composites, the resolved high-temperature TSDC peaks are associated with oxygen-vacancy-related trap states. These peaks were analyzed using the Randall-Wilkins isolated trap model, and Chen’s peak-shape method was used to estimate Ea for asymmetric deep-trap peaks.3

where *kB* is the Boltzmann constant (8.617*10-5 eV/K), *Tm* is the absolute peak temperature, and τ = *Tm-T1*, with *T1* being the temperature at the half-maximum intensity on the low-temperature side of the peak.

(ii) For Pure SG and SG/8BN, the TSDC response is dominated by shallow traps in the SG matrix and filler–matrix interfacial regions. These samples do not contain oxygen-vacancy-related inorganic trapping sites, and their charge detrapping is mainly governed by thermal relaxation of siloxane chains. In SG/8BN, the increased tortuosity introduced by BN nanosheets results in a broadened relaxation spectrum, making conventional half-width estimation less reliable. Therefore, *Ea* was estimated using an Arrhenius-type relation for thermally stimulated processes.4

where *s* is the attempt-to-escape frequency.

**Note S3. Numerical Simulation of Electrical Tree Growth via Phase Field Method**

The electrical-tree growth process in SG was simulated using the partial differential equation module in COMSOL Multiphysics. In the phase-field model, the moving damage interface is represented by a continuous damage variable, allowing tree branching and deflection to be captured without explicitly tracking the interface. The phase-field variable Φ was used to distinguish material states, where Φ = 0 represents intact insulation, Φ = 1 represents a fully damaged conductive channel, and 0 < Φ < 1 represents the transition region.

The phase field model is fundamentally constructed upon a thermodynamic free energy functional, which comprises electrostatic energy, damage energy, and interfacial gradient energy. The total free energy (*F*) is mathematically expressed as:

Where and denote the electrostatic and damage energy densities, respectively, and κ is the gradient energy coefficient controlling the interface width. The temporal evolution of the phase field variable is strictly governed by the Ginzburg Landau kinetic equation:

Where is the mobility coefficient representing the kinetic rate, and is the variational derivative of the free energy. Upon mathematical expansion, the governing phase field equation is formulated as:

Furthermore, the electrostatic field distribution within the dielectric is described by Maxwell equations under the electrostatic approximation:

Where *V* is the electric potential, and the local electric field intensity is computed by *E = -V.* The permittivity is interpolated as a function of the phase field variable. As the material evolves from an insulating state to a damaged state, the permittivity changes, leading to redistribution of the internal electric field.

Electrical-tree propagation was described using an energy-based damage criterion. Damage evolution was initiated when the energy release rate G exceeded the critical value Gcr:

Where *A* represents the area of the damaged region.

**Simulation Implementation and Boundary Conditions**

A two-dimensional model with dimensions of 1 mm × 1 mm was constructed to represent the dielectric region. A high voltage was applied to the top electrode, while the bottom electrode was grounded. An initial damage seed with Φ = 0.1 was introduced near the electrode to initiate electrical-tree growth. The relative permittivity and critical breakdown field were set according to experimentally measured values. The mobility coefficient M was set to 1×10-5, and the gradient energy coefficient κ was set to 2×10-9 to facilitate numerical convergence. The top and bottom boundaries were assigned the applied voltage and 0 V, respectively, while electrical insulation was applied to the lateral boundaries. A zero-flux condition was applied to Φ at all boundaries. The initial domain was set to Φ = 0.01, except for the seed region.

**Note S4. Calculation of Relative Thermal Stress Index**

The thermomechanical stress generated in a constrained encapsulation system was estimated using the classical thermal stress relation:

where σ is defined as the generated thermal stress. The variables *E'*, *ɑ*, and *v* are assigned as the storage modulus, the coefficient of thermal expansion, and the Poisson ratio of the encapsulant, respectively. The parameter *∆T* is specified as the temperature variation during extreme thermal shock cycling.

During comparison, the device geometry, substrate constraint and temperature range were kept consistent. Because the silicone-based encapsulants have similar Poisson ratios, the relative thermal stress can be compared using the product of storage modulus and coefficient of thermal expansion.

To quantitatively compare the thermomechanical loading on wire bonds, a relative thermal stress index is defined. This index is simplified and calculated by normalizing the parameter product of the target composite against the pure silicone gel benchmark, which is represented by:

where *I* is evaluated as the relative thermal stress index. The baseline variables *E0'* and *ɑ0* are defined as the storage modulus and the coefficient of thermal expansion of the Pure SG, respectively. This normalized index was used to compare the relative thermal stress imposed by different encapsulants.

*
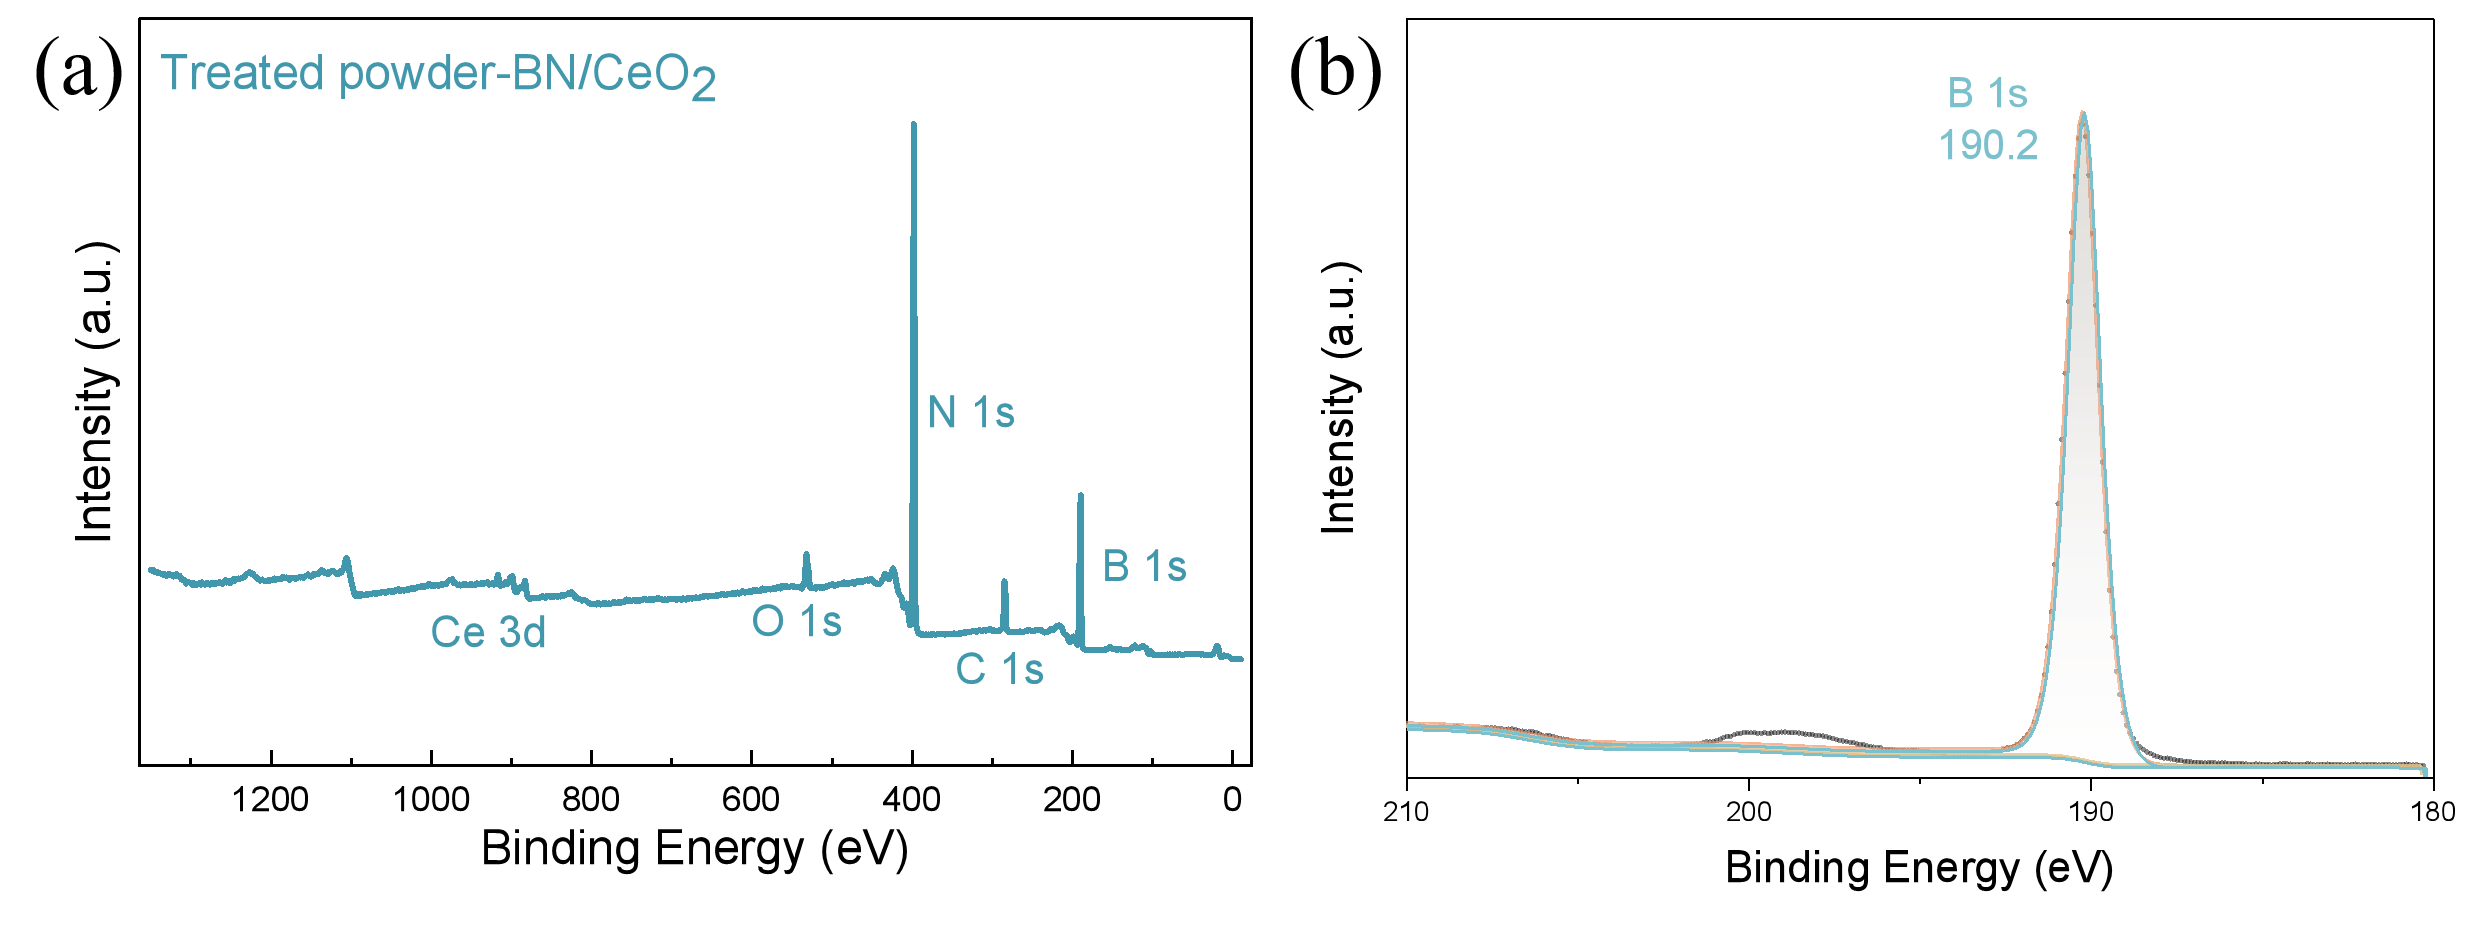
*

**Fig. S1** XPS survey spectra of the treated powder-BN/CeO2.


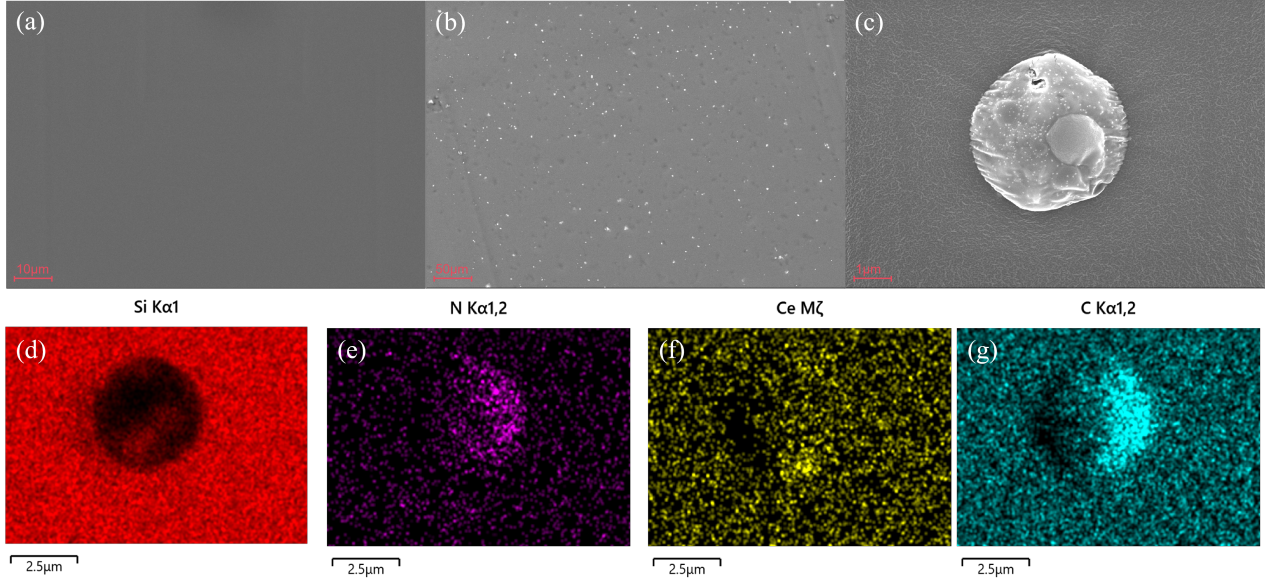


**Fig. S2** (a) Pure SG (b) Filler distribution and (c) local morphology of SG/4BN/4CeO2 under SEM. (d-g) elemental mapping of the agglomerated structures.

*
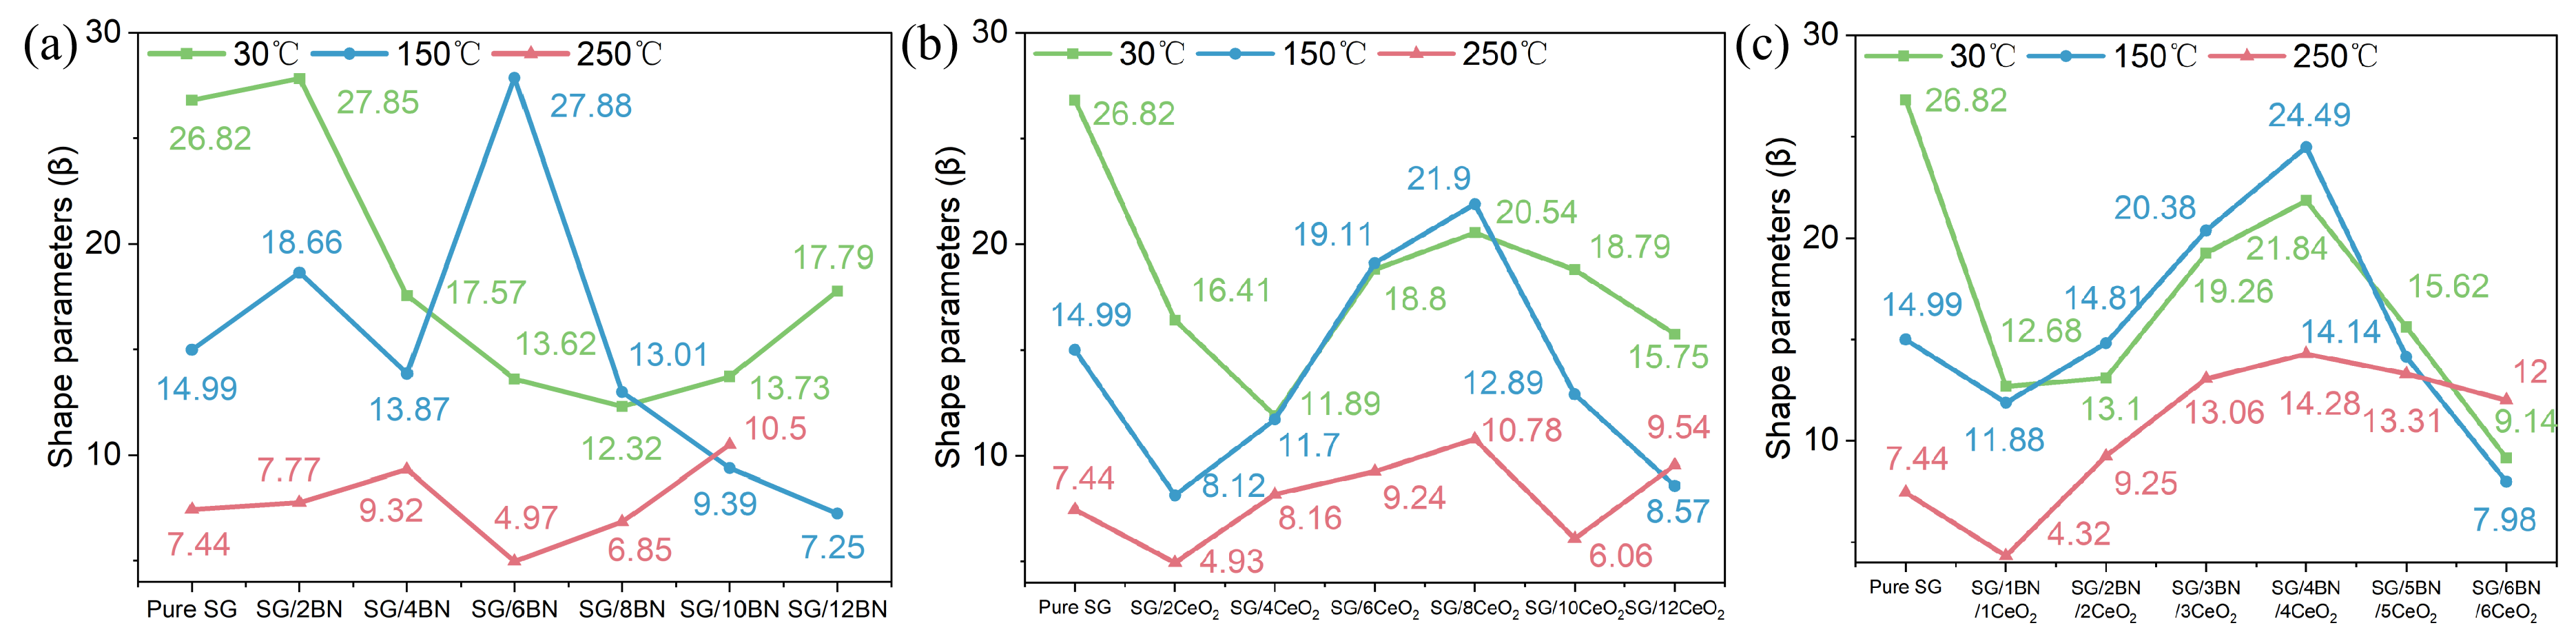
*

**Fig. S3** Shape parameter of the Weibull distribution.

*
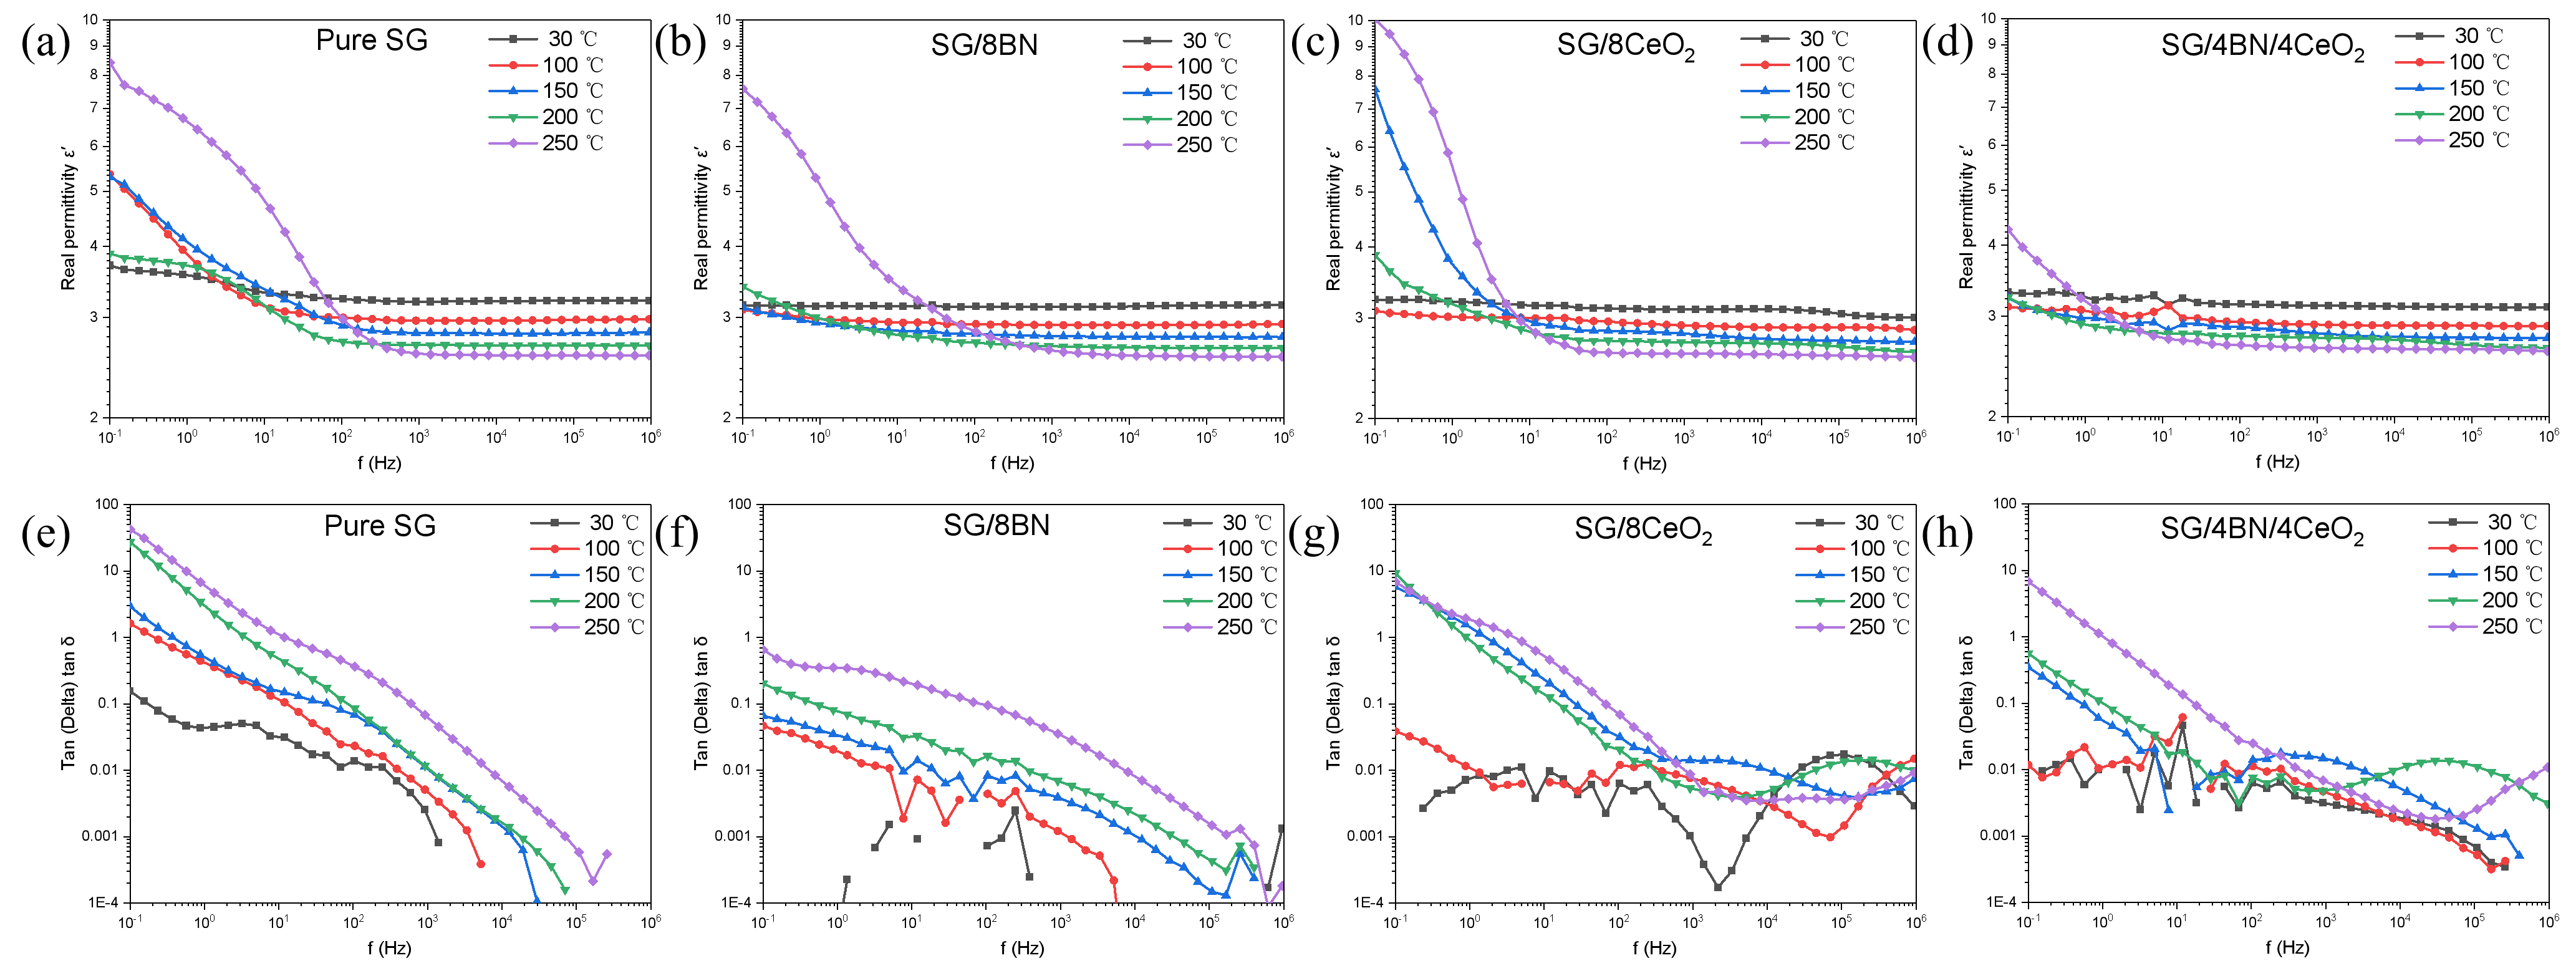
*

**Fig. S4** (a-d) Real part of dielectric constant (ɛ') spectra, (e-h) Dielectric loss (tan δ) spectra for the four systems: Pure SG, SG/8BN, SG/8CeO2, and SG/4BN/4CeO2.

*
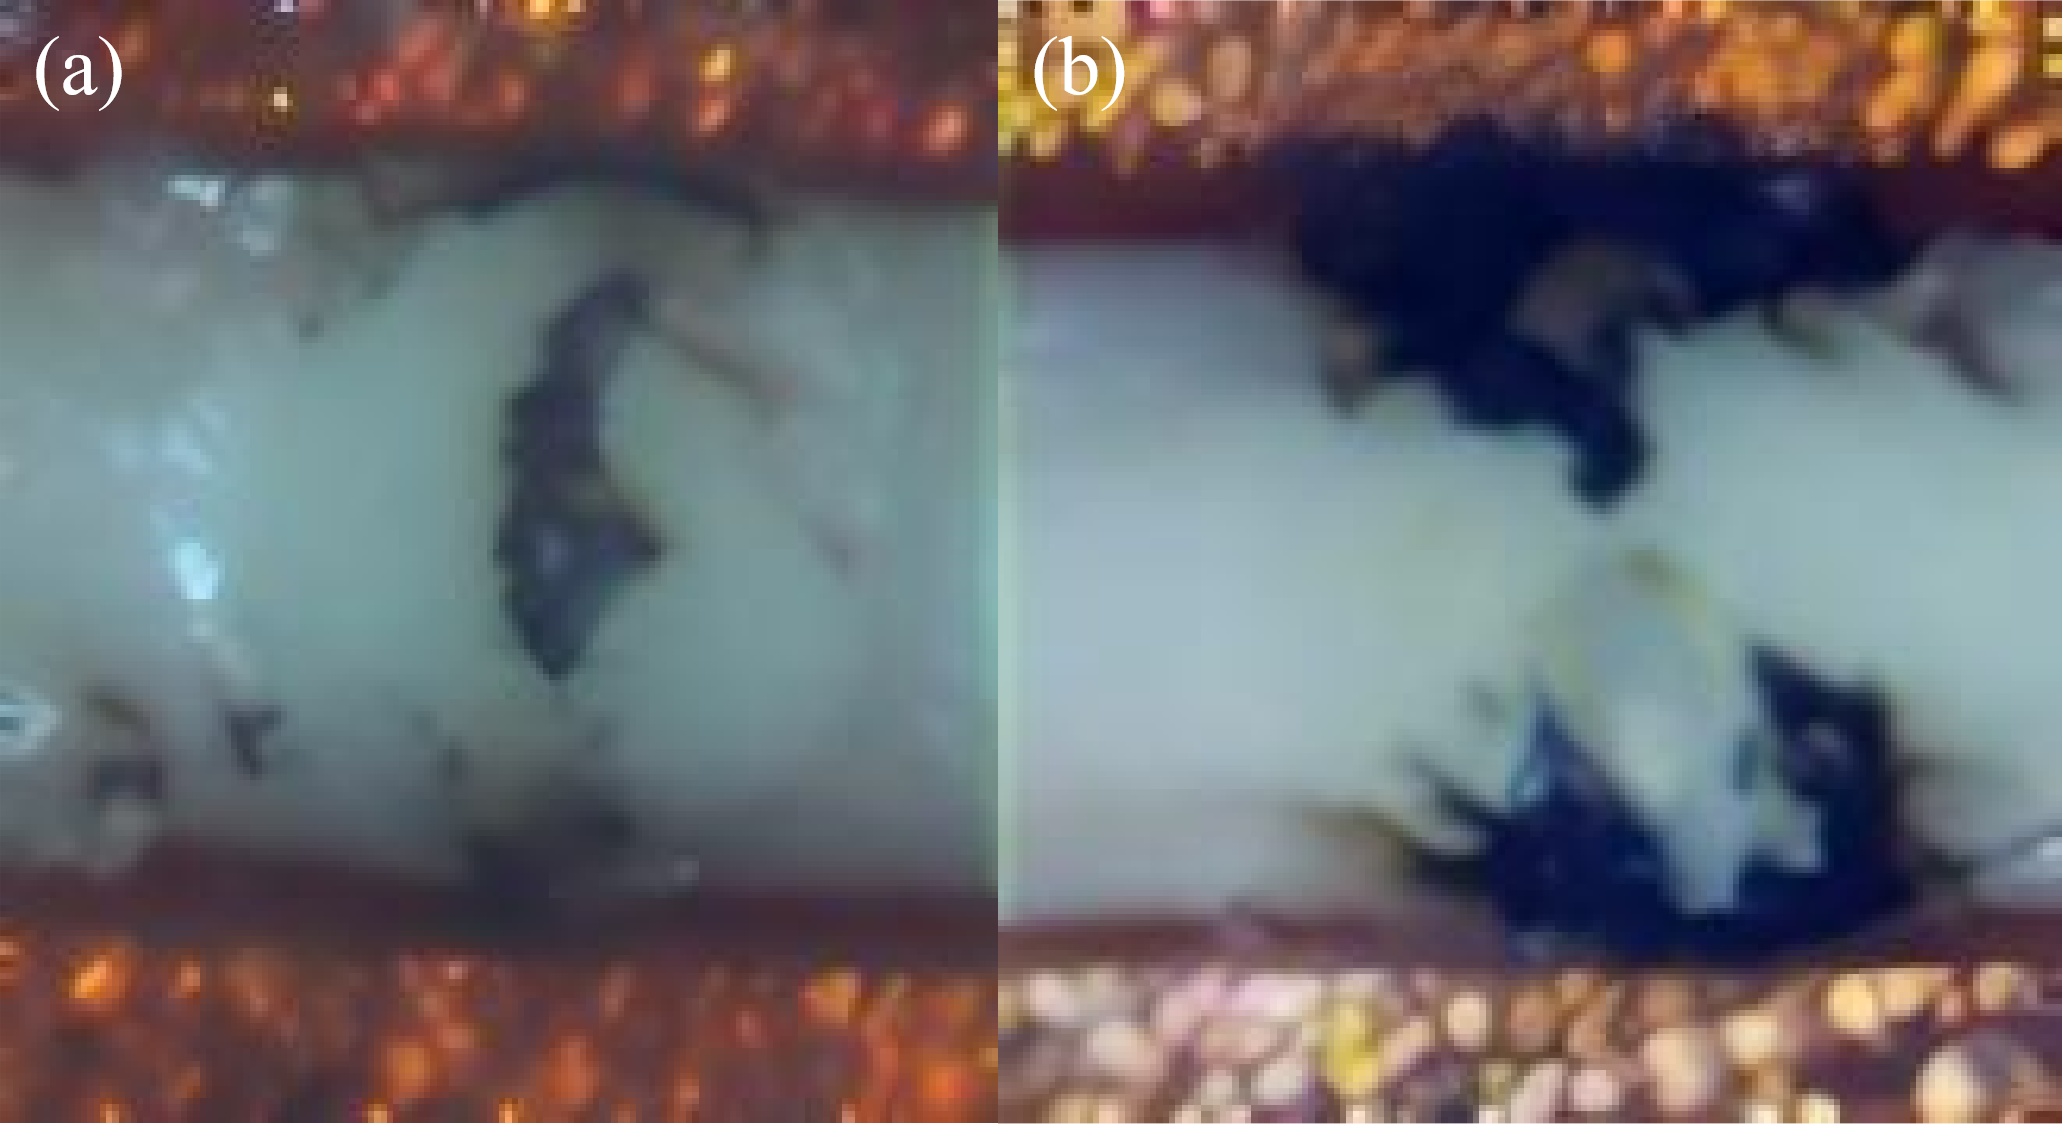
*

**Fig. S5** (a)Pure SG (b)SG/4BN/4CeO2 Breakdown paths at 250°C.


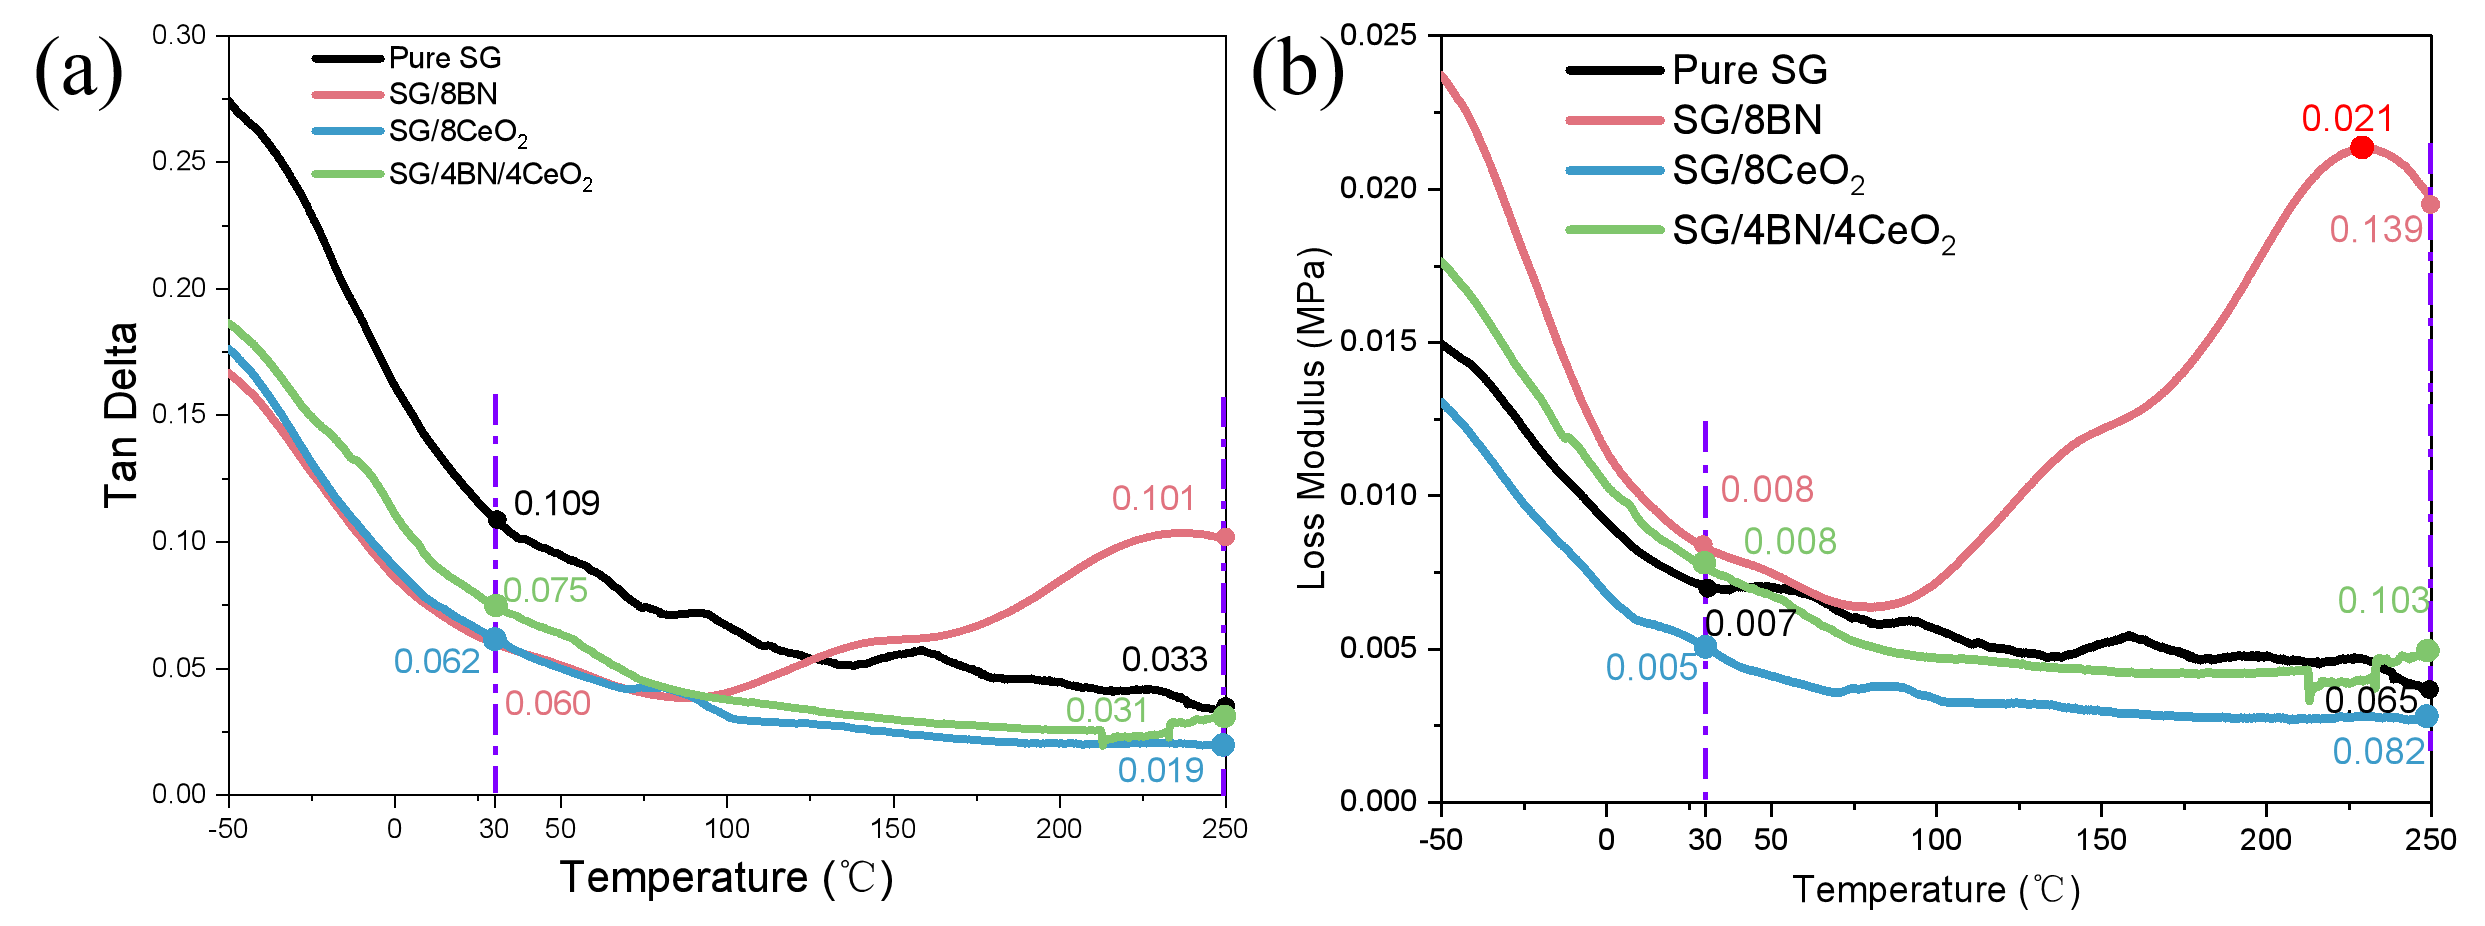


**Fig. S6** Dynamic mechanical analysis (DMA) curves of (a) loss factor (tan δ) and (b) loss modulus (E'') versus temperature.


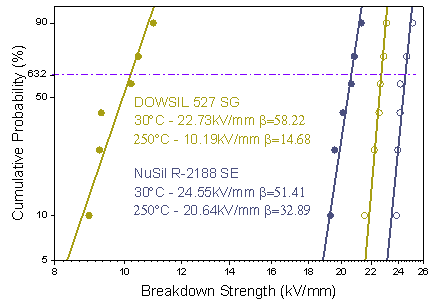


**Fig. S7** The breakdown strength of Dowsil 527 SG and Nusil R-2188 SE.

1 Kresse, G. & Furthmüller, J. Efficient iterative schemes for ab initio total-energy calculations using a plane-wave basis set. *Physical Review B* **54**, 11169-11186, doi:10.1103/PhysRevB.54.11169 (1996).

2 Perdew, J. P., Burke, K. & Ernzerhof, M. Generalized Gradient Approximation Made Simple. *Physical Review Letters* **77**, 3865-3868, doi:10.1103/PhysRevLett.77.3865 (1996).

3 Chen, R. On the Calculation of Activation Energies and Frequency Factors from Glow Curves. *Journal of Applied Physics* **40**, 570-585, doi:10.1063/1.1657437 (1969).

4 Turnhout, J. v. Thermally Stimulated Discharge of Polymer Electrets. *Polymer Journal* **2**, 173-191, doi:10.1295/polymj.2.173 (1971).
